# Supplementary material for: Evaluation of the Therapeutic Potential of the Novel Isotype Specific HDAC Inhibitor 4SC-202 in Urothelial Carcinoma Cell Lines
Source: Springer Nature journal article supplement (doi:10.1007/s11523-016-0444-7), 2016-06-02
Supplement: MOESM1 [file 10241530]

Journal name: Targeted Oncology

Article title: Evaluation of the Therapeutic Potential of the Novel Isotype Specific HDAC Inhibitor 4SC-202 in Urothelial Carcinoma Cell Lines

Author names: Maria Pinkerneil<sup>1</sup>, Michèle J Hoffmann<sup>1</sup>, Hella Kohlhof<sup>2</sup>, Wolfgang A Schulz<sup>1</sup>, Günter Niegisch<sup>1§</sup>

<sup>1</sup>Department of Urology, Medical Faculty, Heinrich-Heine-University, Duesseldorf, Germany

<sup>2</sup>4SC AG, Martinsried, Germany

E-Mail corresponding author: [Guenter.Niegisch@med.uni-duesseldorf.de](mailto:Guenter.Niegisch@med.uni-duesseldorf.de)

**Supplementary Tab S1. Bladder cancer cell lines and control cells used in this study and their origins.** STR profiling for UCCs and control cells was recently performed (Modified from Williams et al., 2005 (1) and Pinkerneil et al., 2016 (2); DSMZ – Deutsche Sammlung von Mikroorganismen und Zellkulturen, Braunschweig, Germany).

| <b>Cell line</b> | <b>Fingerprint</b> | <b>Source</b>                         | <b>Reference</b> |
|------------------|--------------------|---------------------------------------|------------------|
| RT-112           | Dec 2013           | DSMZ (ACC 418)                        | (3, 4)           |
| SW-1710          | Dec 2013           | DSMZ (ACC 426)                        | (5)              |
| 5637             | Dec 2013           | DSMZ (ACC 35)                         | (6)              |
| 639-V            | Dec 2013           | Fogh J, New York, USA                 | (7)              |
| T-24             | Dec 2013           | Fogh J, New York, USA                 | (6, 8)           |
| UM-UC-3          | Dec 2013           | Grossman HB, Houston, USA             | (9)              |
| VM-CUB1          | Dec 2013           | DSMZ (ACC 400)                        | (6, 10)          |
| TERT-NHUC        | Dec 2013           | Knowles MA, Leeds, UK                 | (11, 12)         |
| HBLAK            | June 2015          | CELLnTEC, Bern, Switzerland           |                  |
| HEK-293          | June 2015          | Kolb-Bachofen V, Duesseldorf, Germany | (13)             |

**Supplementary Tab S2. Primer assays for RT-PCR.** QuantiTect primer assays and self-designed TBP-primer used for quantitative RT-PCR and determination of expression levels of class I HDACs HDAC1, HDAC2, HDAC3 and HDAC8 (Modified from Pinkerneil et al., 2016 (2)).

| <b>Gene name</b> | <b>Size (bp)</b> | <b>Cat. No./Sequence 5'-3'</b>                       | <b>T<sub>Annealing</sub> (°C)</b> |
|------------------|------------------|------------------------------------------------------|-----------------------------------|
| <b>HDAC1</b>     | 140              | QT00015239                                           | 55                                |
| <b>HDAC2</b>     | 127              | QT00001890                                           | 55                                |
| <b>HDAC3</b>     | 100              | QT00093730                                           | 55                                |
| <b>HDAC8</b>     | 124              | QT00049630                                           | 55                                |
| <b>TBP</b>       | 119              | Fwd. ACAACAGCCTGCCACCTTA<br>Rev. GAATAGGCTGTGGGTCAGT | 55                                |

**Supplementary Tab S3. Antibodies used for western blot analyses.** Antibodies for western blotting of whole cell lysates and histone extracts, including specifications and dilutions (Modified from Pinkerney et al., 2016 (2)).

| <b>Target</b>                                 | <b>Size (kDa)</b> | <b>Dilution</b>     | <b>Cat. No.</b> | <b>Source</b>             |
|-----------------------------------------------|-------------------|---------------------|-----------------|---------------------------|
| <b>P21 Sx118</b>                              | 21                | 1:1,000             | 556430          | BD Biosciences            |
| <b>Cyclin A H-432</b>                         | 54                | 1:1,000             | sc-751          | Santa Cruz Biotechnology  |
| <b>Cyclin B1 H-433</b>                        | 60                | 1:1,000             | sc-752          | Santa Cruz Biotechnology  |
| <b>Cyclin D1 H-295</b>                        | 37                | 1:1,000             | sc-753          | Santa Cruz Biotechnology  |
| <b>Cyclin E HE-12</b>                         | 53                | 1:500               | sc-247          | Santa Cruz Biotechnology  |
| <b>Cleaved PARP Asp214</b>                    | 89                | 1:1,000             | 9541            | Cell Signaling Technology |
| <b>Cleaved caspase-3</b>                      | 17                | 1:1,000             | 9664            | Cell Signaling Technology |
| <b>Acetylated <math>\alpha</math>-Tubulin</b> | 55                | 1:15,000            | T-7451          | Sigma Aldrich             |
| <b>GAPDH</b>                                  | 36                | 1:10,000            | ab8245          | Abcam                     |
| <b>Acetylated Histone H3</b>                  | 17                | 1:2,000             | 39139           | Active Motif              |
| <b>Acetylated Histone H4</b>                  | 8                 | 1:1,000             | 39243           | Active Motif              |
| <b>Total histone H3</b>                       | 17                | 1:1,000             | 3638            | Cell Signaling Technology |
| <b>HRP-conjugated goat-anti-mouse</b>         | ---               | 1:5,000 - 1:100,000 | sc-2005         | Santa Cruz Biotechnology  |
| <b>HRP-conjugated goat-anti-rabbit</b>        | ---               | 1:5,000 - 1:100,000 | Sc-2004         | Santa Cruz Biotechnology  |

1. Williams SV, Adams J, Coulter J, Summersgill BM, Shipley J, Knowles MA. Assessment by M-FISH of karyotypic complexity and cytogenetic evolution in bladder cancer in vitro. *Genes, chromosomes & cancer*. 2005;43:315-28.
2. Pinkerneil M, Hoffmann MJ, Deenen R, Köhrer K, Arent T, Schulz WA, et al. Inhibition of Class I Histone Deacetylases 1 and 2 Promotes Urothelial Carcinoma Cell Death by Various Mechanisms. *Molecular cancer therapeutics*. 2016;15:299-312.
3. Masters JR, Hepburn PJ, Walker L, Highman WJ, Trejdosiewicz LK, Povey S, et al. Tissue culture model of transitional cell carcinoma: characterization of twenty-two human urothelial cell lines. *Cancer research*. 1986;46:3630-6.
4. Marshall CJ, Franks LM, Carbonell AW. Markers of neoplastic transformation in epithelial cell lines derived from human carcinomas. *Journal of the National Cancer Institute*. 1977;58:1743-51.
5. Kyriazis AA, Kyriazis AP, McCombs WB, 3rd, Peterson WD, Jr. Morphological, biological, and biochemical characteristics of human bladder transitional cell carcinomas grown in tissue culture and in nude mice. *Cancer research*. 1984;44:3997-4005.
6. Williams RD. Human urologic cancer cell lines. *Investigative urology*. 1980;17:359-63.
7. Elliott AY, Bronson DL, Stein N, Fraley EE. In vitro cultivation of epithelial cells derived from tumors of the human urinary tract. *Cancer research*. 1976;36:365-9.
8. Bubenik J, Baresova M, Viklicky V, Jakoubkova J, Sainerova H, Donner J. Established cell line of urinary bladder carcinoma (T24) containing tumour-specific antigen. *International journal of cancer Journal international du cancer*. 1973;11:765-73.
9. Grossman HB, Wedemeyer G, Ren L, Wilson GN, Cox B. Improved growth of human urothelial carcinoma cell cultures. *The Journal of urology*. 1986;136:953-9.
10. Grimm MO, Jurgens B, Schulz WA, Decken K, Makri D, Schmitz-Drager BJ. Inactivation of tumor suppressor genes and deregulation of the c-myc gene in urothelial cancer cell lines. *Urological research*. 1995;23:293-300.
11. Chapman EJ, Williams SV, Platt FM, Hurst CD, Chambers P, Roberts P, et al. Integrated genomic and transcriptional analysis of the in vitro evolution of telomerase-immortalized urothelial cells (TERT-NHUC). *Genes, chromosomes & cancer*. 2009;48:694-710.
12. Chapman EJ, Hurst CD, Pitt E, Chambers P, Aveyard JS, Knowles MA. Expression of hTERT immortalises normal human urothelial cells without inactivation of the p16/Rb pathway. *Oncogene*. 2006;25:5037-45.
13. Graham FL, Smiley J, Russell WC, Nairn R. Characteristics of a human cell line transformed by DNA from human adenovirus type 5. *The Journal of general virology*. 1977;36:59-74.
